# Supplementary material
Source: Springer Nature journal article supplement (https://www.springermedizin.de/resource/supplementary/12974_2011_449_MOESM4_ESM.pdf/9601328)

Adult

Aged Intact

Aged Impaired

DG

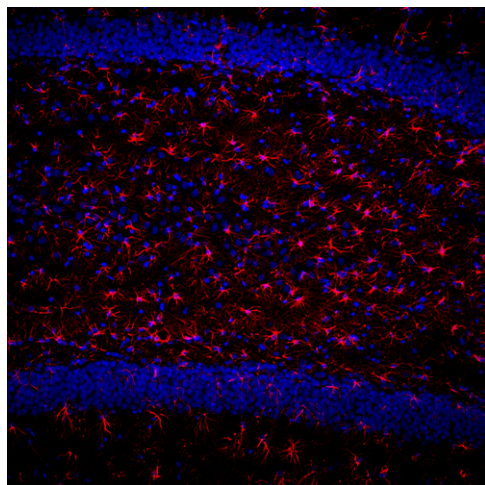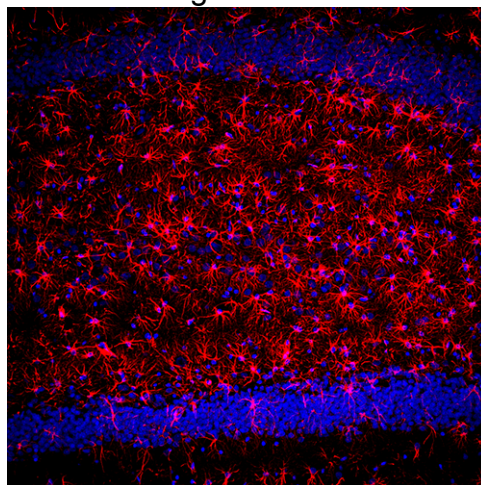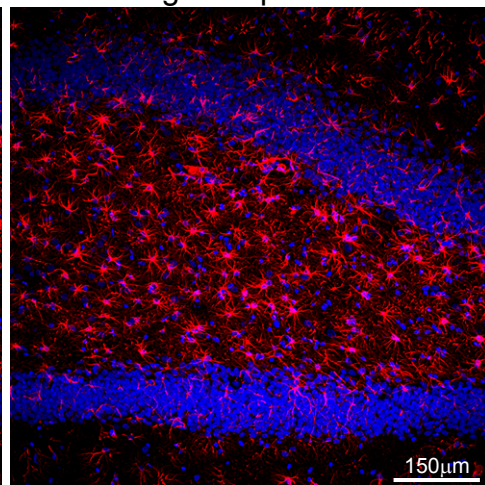

CA3

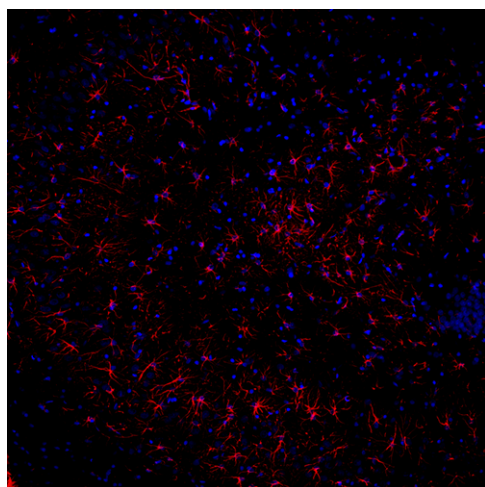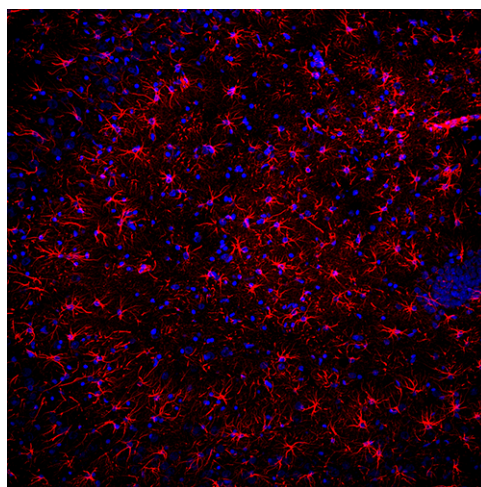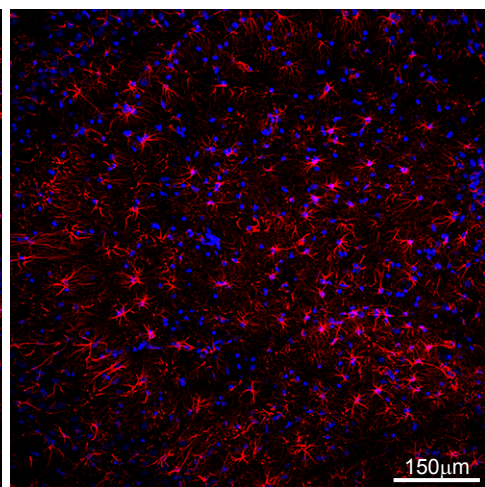

CA1

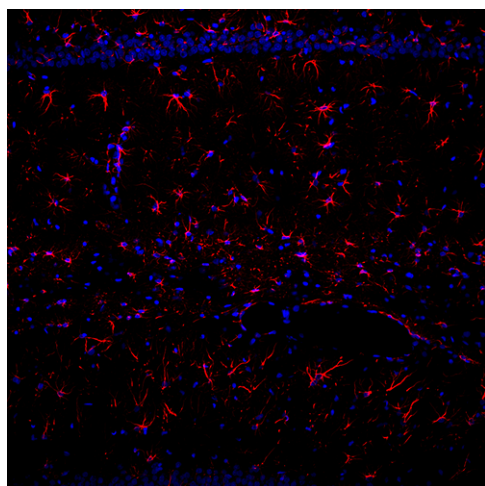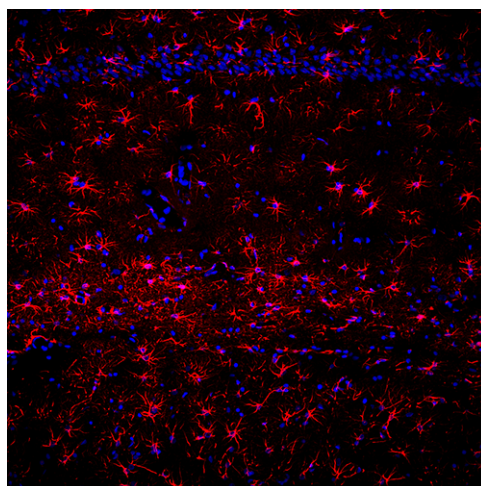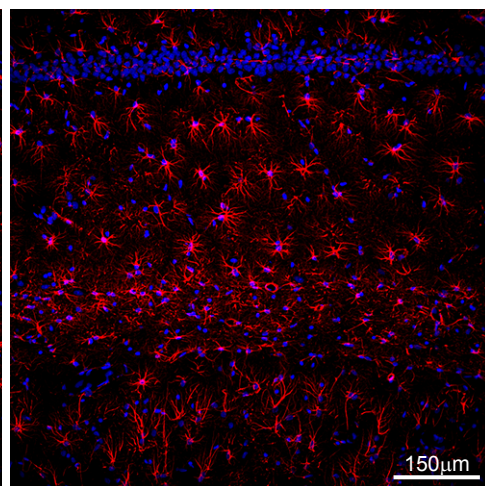

Supplement: MOESM4 [file 9601328]
